# Supplementary material
Source: PubMed Central journal article supplement (PMC3103357)
Supplement: supp_M111.230094_jbc.M111.230094-1.pdf [file supp_M111.230094_jbc.M111.230094-1.pdf]

INDEX:

Table S1. Tubulin chaperones and associated proteins in the Prostecobacter genome

Table S2. Oligonucleotides employed in this work.

Table S3.  $\alpha$ - and  $\beta$ -tubulin tree-determinants

Table S4. Tree determinants per protein zones

Figure S1. Tree determinants mapped onto structure

Figure S2. Cooperative BtubA/B polymerization

Figure S3. GTP hydrolysis by BtubA/B polymers in Tris-KGlu buffer

Figure S4. Inhibition of microtubule assembly by bacterial tubulin

Figure S5. Alignments of bacterial and eukaryotic tubulins and logos for loops 1 and S.

Figure S6 Circular dichroism of BtubA/B mutants.

Figure S7 Circular dichroism of BtubA/B chimeras.

**Table S1.** Results of scanning the *P. dejongeii* genome with protein family profiles (Pfam) of chaperones and other proteins interacting with tubulin or microtubules.

| <b>Protein</b>                 | <b>Pfam code</b> | <b>Description</b>                                  | <b>Number of hits found<sup>a</sup></b> | <b>Bit score of hits</b> | <b>Trusted score cut-off<sup>b</sup></b> | <b>Number of trusted hits</b> |
|--------------------------------|------------------|-----------------------------------------------------|-----------------------------------------|--------------------------|------------------------------------------|-------------------------------|
| CCT chaperonin                 | PF00118          | TCP-1/cpn60 chaperonin family                       | 1                                       | 155.1                    | 19.8                                     | 1                             |
| CRIP1                          | PF10235          | Microtubule-associated protein CRIP1                | 0                                       |                          |                                          | 0                             |
| Dynein heavy chain N-t 1       | PF08385          | Dynein heavy chain, N-terminal region 1             | 0                                       |                          |                                          | 0                             |
| Dynein heavy chain N-t 2       | PF08393          | Dynein heavy chain, N-terminal region 2             | 1                                       | 11.5                     | 24.9                                     | 0                             |
| Dynein light chain N-t 2       | PF01221          | Dynein light chain type 1                           | 0                                       |                          |                                          | 0                             |
| Dynein heavy chain             | PF03028          | Dynein heavy chain                                  | 0                                       |                          |                                          | 0                             |
| Kinesin                        | PF00225          | Kinesin motor domain                                | 0                                       |                          |                                          | 0                             |
| Kinesin light chain            | PF00515          | Tetratricopeptide repeat                            | 28                                      | 9.5-32.9                 | 20.4                                     | 13                            |
| MAP 1A/1B                      | PF02991          | Microtubule associated protein 1A/1B, light chain 3 | 0                                       |                          |                                          | 0                             |
| MAP2                           | PF08377          | MAP2/Tau projection domain                          | 0                                       |                          |                                          | 0                             |
| MAP65                          | PF03999          | Microtubule associated protein (MAP65/ASE1 family)  | 0                                       |                          |                                          | 0                             |
| MAP7                           | PF05672          | MAP7 (E-MAP-115) family                             | 0                                       |                          |                                          | 0                             |
| Microtubule-associated protein | PF07989          | Microtubule associated                              | 1                                       | 10.6                     | 22.0                                     | 0                             |
| Prefoldin family 1             | PF02996          | Prefoldin subunit                                   | 0                                       |                          |                                          | 0                             |

|                        |         |                                             |   |          |      |   |
|------------------------|---------|---------------------------------------------|---|----------|------|---|
| Prefoldin family 2     | PF01920 | Prefoldin subunit                           | 3 | 9.4-13.3 | 21.1 | 0 |
| Stathmin               | PF00836 | Stathmin family                             | 0 |          |      | 0 |
| Tau                    | PF00418 | Tau and MAP protein, tubulin-binding repeat | 1 | 11.1     | 26.6 | 0 |
| Tubulin cofactor A     | PF02970 | Tubulin folding cofactor A                  | 0 |          |      | 0 |
| Tubulin cofactor B     | PF01302 | CAP-Gly domain                              | 0 |          |      | 0 |
| Tubulin cofactor C     | PF07986 | Tubulin folding cofactor C                  | 0 |          |      | 0 |
| Tubulin cofactor D C-t | PF12612 | Tubulin folding cofactor D C-terminal       | 0 |          |      | 0 |

<sup>a</sup> Number of hits below an E-value of 1.0

<sup>b</sup> Obtained from <http://pfam.sanger.ac.uk/>

**Table S2. Oligonucleotides employed in this work.** Long oligonucleotides were used to introduce multiple substitutions (underscored), insertions (bold) and deletions (stars) from bovine tubulin into Btub. Oligos were designed to minimize the number of changes to favour hybridization with original template.

| Name      | Sequence (5' to 3')                                                                                       | Location (5'-start position) |
|-----------|-----------------------------------------------------------------------------------------------------------|------------------------------|
| A_T147G-F | GCCATCGGTGGCGGT <u>G</u> GAGGGTCGGGTTTTGGGG                                                               | 424 (BtubA)                  |
| A_T147G-R | CCCCAAAACCCGACCCT <u>C</u> CACCGCCACCGATGGC                                                               | 457 (BtubA)                  |
| A1A-F     | GTAGCGCCACGTGGGG <u>G</u> GACGACTCTTTT <u>A</u> CC <u>A</u> CTTCTTCTGCGAAACTTCCTCTGGCAGCTAC               | 127 (BtubA)                  |
| A1A-R     | GTAGCTGCCAGAGGAAGTTTCGC <u>A</u> GAAGAAGG <u>I</u> GGTAAAGAGTCGTCG <u>C</u> CCCCACGTGGCGCTAC              | 192 (BtubA)                  |
| AMA-F     | TGCGCCTTTGCTCCGGTGA <u>T</u> A <u>T</u> CGGCAGAGAAGGCTTACCACGAGCAATTGAGCATTGAGGAGATGATC                   | 819 (BtubA)                  |
| AMA-R     | GATCATCTCCTCAATGCICAATT <u>G</u> CTCGTGGT <u>A</u> AGCCTTCTCTG <u>C</u> CGATATCA <u>C</u> CGGAGCAAAGGCGCA | 888 (BtubA)                  |
| BMA-F     | GTGCGCCTTTGCTCCGTTGACA <u>I</u> CGCGAGGCAGCCAACAGTATAGGGCATTGACCATTGAGGAGATGATC                           | 819 (BtubA)                  |
| BMA-R     | GATCATCTCCTCAATGGTCAATG <u>C</u> CCATACTGTTGGC <u>I</u> GCTCGCGATGTCAACGGAGCAAAGGCGCAC                    | 888 (BtubA)                  |
| ASA-F     | GCTATGTGGAGCAGCCCCTACTGTCTGCCAGGAGGAGACCTCGCAA <u>A</u> AGTCCAGAAGAGCATGGTCTGC                            | 1070 (BtubA)                 |
| ASA-R     | GCAGCACCATGCTCTTCTGGACTTTTGCAGGCTCCTCCTGGGACGACAGTAGGGGCTGCTCCACATAGC                                     | 1116 (BtubA)                 |
| B_S144G-F | CTCCATCGGTGGCGGT <u>G</u> GCGGCTCAGGCCTTGGC                                                               | 414 (BtubB)                  |
| B_S144G-R | GCCAAGGCCTGAGCC <u>G</u> CACCGCCACCGATGGA                                                                 | 447 (BtubB)                  |
| B1B-F     | GCAGGTACCCTGAAAGGAG <u>A</u> CAGC***GATCTGCAACTTGAACGCATGGAAGTCTTCTTT                                     | 97 (BtubB)                   |
| B1B-R     | AAAGAAGACTTCCATGCGTTCAGTTGCAGATC***GCTGTCTCCTTTCAGGGTACCTGC                                               | 156 (BtubB)                  |
| BMB-F     | GCTAGCTTTGCCCGITGACTAGCAGGGGATCGCAACAGTACAGGGCGCTGAATTTCCAGACCTG                                          | 802 (BtubB)                  |
| BMB-R     | CAGGTCTGGGAAATTCAGCGCCCTGTACTGTTGCATCCCCTGCTAGTCAACGGCGCAAAGCTAGC                                         | 867 (BtubB)                  |
| AMB-F     | GCTAGCTTTGCCCGGTGAI <u>T</u> TCGGCGGAAAGGCATACCACGAGCAGTIGAGTTTCCAGACCTGGC                                | 802 (BtubB)                  |
| AMB-R     | GCCAGGTCTGGGAAACTCAACTGCICGTGGTATGCCTTITCCGCCGAAATCACCAGGCGCAAAGCTAGC                                     | 869 (BtubB)                  |
| BSB-F     | AAACTGGGGTATCGGGATATACCGCCGAGAGGTTTTAAAAATGAGTGGCCTGGCCCTG                                                | 1048 (BtubB)                 |
| BSB-R     | CAGGGCCAGGCCACTCATTTTTAAACCTCTCGGCGGTATATCCGCATACCCAGTTT                                                  | 1104 (BtubB)                 |

**Table S3.  $\alpha$ - and  $\beta$ -tubulin tree-determinant residues.** Tree-determinants were calculated by the Sequence Harmony method (Exp. Procedures) where upper case indicates preferred residue for that position and lower case any other present residue.

| Secondary structure element | $\alpha$ -tubulin |          | $\beta$ -tubulin |           | BtubA |                      | BtubB |                      |
|-----------------------------|-------------------|----------|------------------|-----------|-------|----------------------|-------|----------------------|
|                             | Id <sup>a</sup>   | Residues | Id <sup>a</sup>  | Residues  | Id    | Residue <sup>b</sup> | Id    | Residue <sup>b</sup> |
| S1                          | 8                 | Hn       | 8                | Q         | 10    | <b>S</b>             | 8     | <b>H</b>             |
| H1                          | 12                | Ag       | 12               | C         | 14    | <b>A</b>             | 12    | <b>C</b>             |
| H1                          | 14                | ICVta    | 14               | N         | 16    | <b>N</b>             | 14    | <b>N</b>             |
| H1                          | 18                | N        | 18               | Astcg     | 20    | <b>A</b>             | 18    | <b>D</b>             |
| H1                          | 20                | Ca       | 20               | F         | 22    | <b>F</b>             | 20    | <b>F</b>             |
| H1                          | 23                | L        | 23               | Vti       | 25    | <b>T</b>             | 23    | <b>L</b>             |
| H1-S2                       | 24                | Yf       | 24               | Ivm       | 26    | <b>V</b>             | 24    | <b>A</b>             |
| H1-S2                       | 26                | L        | 26               | Dge       | 28    | <b>L</b>             | 26    | <b>R</b>             |
| H1-S2                       | 36                | Mlfkv    | 36               | Y         | 38    | <b>Q</b>             | 36    | <b>L</b>             |
| H1-S2                       | 44                | Dhr      | 42               | Lim       | 49    | <b>W</b>             | 46    | <b>S</b>             |
| H1-S2                       | 46                | Asg      | 44               | R         | 51    | <b>S</b>             | 47    | <b>N</b>             |
| H1-S2                       | 47                | F        | 45               | Imalv     | 52    | <b>F</b>             | 48    | <b>M</b>             |
| H1-S2                       | 49                | T        | 47               | V         | 54    | <b>S</b>             | 50    | <b>V</b>             |
| H1-S2                       | 54                | T        | 52               | Asvgi     | 59    | <b>S</b>             | 55    | <b>V</b>             |
| T2                          | 73                | Tns      | 71               | Ga        | 76    | <b>S</b>             | 72    | <b>G</b>             |
| H2                          | 77                | E        | 75               | Satv      | 80    | <b>N</b>             | 76    | <b>R</b>             |
| H2-S3                       | 84                | Rks      | 82               | G         | 86    | <b>G</b>             | 83    | <b>S</b>             |
| H2-S3                       | 88                | Hn       | 86               | Rk        | 90    | <b>N</b>             | 87    | <b>D</b>             |
| H2-S3                       | 90                | Eq       | 88               | D         | 92    | <b>A</b>             | 89    | <b>S</b>             |
| H2-S3                       | 92                | Lmi      | 90               | Fyv       | 94    | <b>L</b>             | 91    | <b>I</b>             |
| S3                          | 96                | K        | 94               | Q         | 98    | <b>T</b>             | 95    | <b>I</b>             |
| T3                          | 97                | Ea       | 95               | Stncp     | 99    | <b>E</b>             | 96    | <b>P</b>             |
| T3                          | 98                | D        | 96               | G         | 100   | <b>G</b>             | 97    | <b>G</b>             |
| T3                          | 103               | Yf       | 101              | W         | 105   | <b>F</b>             | 102   | <b>W</b>             |
| T3                          | 110               | IV       | 108              | E         | 112   | <b>A</b>             | 109   | <b>E</b>             |
| H3                          | 112               | Kre      | 110              | Avqs      | 114   | <b>R</b>             | 111   | <b>E</b>             |
| H3                          | 121               | Rkap     | 119              | V         | 123   | <b>R</b>             | 120   | <b>V</b>             |
| H3                          | 125               | Lvmai    | 123              | E         | 127   | <b>E</b>             | 124   | <b>A</b>             |
| S4                          | 136               | Lfim     | 134              | Q         | 138   | <b>I</b>             | 135   | <b>L</b>             |
| H4                          | 155               | E        | 153              | Sng       | 157   | <b>E</b>             | 154   | <b>E</b>             |
| H4                          | 158               | Sa       | 156              | Rh        | 160   | <b>K</b>             | 157   | <b>R</b>             |
| H4                          | 159               | Vtild    | 157              | E         | 161   | <b>E</b>             | 158   | <b>Q</b>             |
| H4-S5                       | 162               | Gt       | 160              | P         | 164   | <b>G</b>             | 161   | <b>P</b>             |
| H4-S5                       | 163               | Kr       | 161              | D         | 165   | <b>E</b>             | 162   | <b>K</b>             |
| H4-S5                       | 164               | K        | 162              | R         | 166   | <b>I</b>             | 163   | <b>K</b>             |
| S5                          | 166               | K        | 164              | Mil       | 168   | <b>V</b>             | 165   | <b>I</b>             |
| T5                          | 172               | Ywt      | 170              | Vfmicl    | 174   | <b>L</b>             | 171   | <b>V</b>             |
| T5                          | 179               | Tns      | 177              | Dl        | 181   | <b>S</b>             | 178   | <b>D</b>             |
| T5                          | 180               | Asg      | 178              | Tvc       | 182   | <b>V</b>             | 179   | <b>S</b>             |
| H5                          | 193               | STag     | 191              | Ql        | 195   | <b>T</b>             | 192   | <b>R</b>             |
| S6                          | 200               | CVg      | 198              | Eahkq     | 202   | <b>A</b>             | 199   | <b>G</b>             |
| H6                          | 214               | Rknq     | 212              | Fmsy      | 216   | <b>H</b>             | 213   | <b>K</b>             |
| H6-H7                       | 216               | Nshlq    | 214              | T         | 218   | <b>K</b>             | 215   | <b>K</b>             |
| H6-H7                       | 218               | Dgns     | 216              | Kr        | 220   | <b>N</b>             | 217   | <b>N</b>             |
| H7                          | 226               | Nhs      | 224              | D         | 228   | <b>D</b>             | 224   | <b>D</b>             |
| H7                          | 229               | Rnq      | 227              | Hgk       | 231   | <b>L</b>             | 227   | <b>N</b>             |
| H7                          | 233               | Q        | 231              | Avilmfgst | 235   | <b>E</b>             | 231   | <b>L</b>             |
| H7                          | 237               | S        | 235              | G         | 239   | <b>G</b>             | 235   | <b>S</b>             |
| T7                          | 250               | Vl       | 248              | SAC       | 252   | <b>V</b>             | 248   | <b>T</b>             |
| H8                          | 253               | Tn       | 251              | R         | 257   | <b>R</b>             | 251   | <b>S</b>             |
| H8                          | 254               | Ed       | 252              | K         | 258   | <b>E</b>             | 252   | <b>E</b>             |

|         |     |        |     |         |     |   |     |   |
|---------|-----|--------|-----|---------|-----|---|-----|---|
| H8      | 255 | Fi     | 253 | Lm      | 259 | L | 253 | F |
| H8      | 256 | Qp     | 254 | Ac      | 260 | L | 254 | V |
| H8      | 257 | T      | 255 | V       | 261 | T | 255 | T |
| S7      | 268 | PMva   | 266 | Fy      | 272 | L | 266 | L |
| S7      | 271 | Sta    | 269 | G       | 275 | A | 269 | S |
| S7-H9   | 280 | Kr     | 278 | Savnt   | 284 | R | 278 | Q |
| S7-H9   | 283 | Hr     | 281 | Yf      | 287 | F | 281 | Q |
| S7-H9   | 284 | Eq     | 282 | Rniks   | 288 | E | 282 | V |
| H9-S8   | 304 | Kvnr   | 302 | Adl     | 308 | A | 302 | A |
| H9-S8   | 313 | M      | 311 | L       | 317 | L | 311 | L |
| S8      | 314 | As     | 312 | T       | 318 | S | 312 | A |
| S8-H10  | 322 | D      | 320 | RKhpqv  | 326 | I | 320 | D |
| H10     | 329 | Nhqt   | 327 | De      | 333 | A | 327 | D |
| H10     | 331 | As     | 329 | Qn      | 335 | A | 329 | N |
| H10     | 332 | VI     | 330 | MI      | 336 | A | 330 | M |
| H10     | 336 | Kr     | 334 | Qv      | 340 | M | 334 | R |
| H10-S9  | 341 | Ivfl   | 339 | Satgnpq | 344 | L | 337 | L |
| H10-S9  | 347 | Csr    | 345 | Il      | 350 | I | 343 | M |
| H10-S9  | 349 | Tc     | 347 | Nhs     | 352 | T | 345 | A |
| H10-S9  | 350 | Gs     | 348 | Na      | 353 | A | 346 | S |
| S9      | 351 | F      | 349 | Vitc    | 354 | F | 349 | L |
| S9      | 354 | G      | 352 | ASt     | 357 | G | 352 | G |
| S9-S10  | 358 | Qeh    | 356 | lvs     | 361 | Q | 356 | T |
| S9-S10  | 369 | As     | 359 | Rkt     | 364 | I | 359 | E |
| S9-S10  | 370 | Kpsenr | 360 | Gd      | 365 | S | 360 | G |
| S10     | 373 | Rk     | 363 | Mi      | 368 | K | 363 | S |
| S10     | 377 | M      | 367 | F       | 372 | L | 367 | A |
| S10     | 379 | Sa     | 369 | Ge      | 374 | A | 369 | V |
| H11     | 385 | AscV   | 375 | Qhr     | 380 | A | 375 | A |
| H11     | 387 | AV     | 377 | Lmict   | 382 | V | 377 | V |
| H11     | 394 | Kn     | 384 | Qh      | 389 | N | 384 | Q |
| H11     | 397 | Li     | 387 | Avgks   | 392 | K | 387 | I |
| H11-H12 | 405 | V      | 395 | Lim     | 400 | A | 395 | T |
| H12     | 424 | Dv     | 414 | N       | 419 | S | 414 | Q |
| H12     | 426 | Aly    | 416 | Nqhst   | 421 | Q | 416 | A |
| H12     | 427 | Ae     | 417 | D       | 422 | E | 417 | T |
| H12     | 429 | E      | 419 | Vil     | 424 | V | 419 | A |

<sup>a</sup> Residue numbering taking *B. taurus* tubulin (PDB entry 1JFF) as reference

<sup>b</sup> Color code:  $\alpha$ -tubulin-like (red),  $\beta$ -tubulin-like (blue) or none of them (green) according to single amino acid or its biochemical group.

**Table S4. Tubulin tree-determinants analyzed by protein zone.**

| Eukaryotic tubulin zones                                                     | Tree determinants conserved in bacterial tubulin |         |      |          |         |      |
|------------------------------------------------------------------------------|--------------------------------------------------|---------|------|----------|---------|------|
|                                                                              | BtubA                                            |         |      | BtubB    |         |      |
|                                                                              | $\alpha$                                         | $\beta$ | None | $\alpha$ | $\beta$ | None |
| Nucleotide binding loops T1-T7                                               | 5                                                | 3       | 1    | 1        | 7       | 1    |
| Loops H1-S1, S7-H9, S9-S10                                                   | 7                                                | 3       | 4    | 1        | 4       | 9    |
| Other loops                                                                  | 6                                                | 3       | 6    | 8        | 1       | 6    |
| Regular secondary structure elements ( $\alpha$ -helix and $\beta$ -strands) | 18                                               | 15      | 17   | 21       | 14      | 15   |
| All zones                                                                    | 36                                               | 24      | 28   | 31       | 26      | 31   |

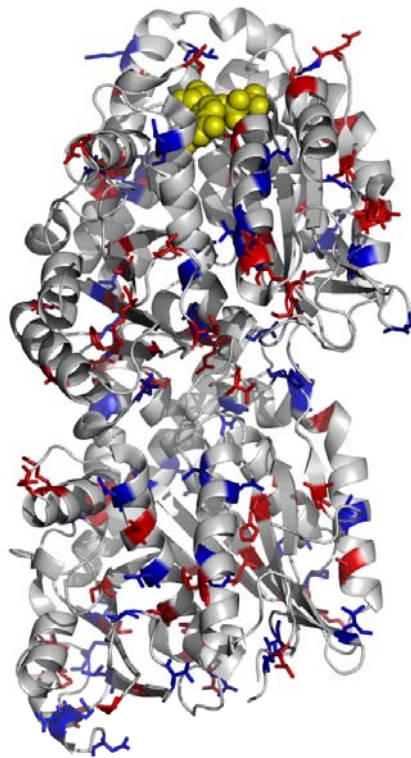

**Figure S1.** Tree-determinant residues from  $\alpha$ - and  $\beta$ -tubulin mapped on the BtubA/B dimer structure (PDB entry 2BTQ).  $\alpha$ -tubulin-like residues are marked in red,  $\beta$ -tubulin-like residues in blue (see Tables S3 and S4 for details).

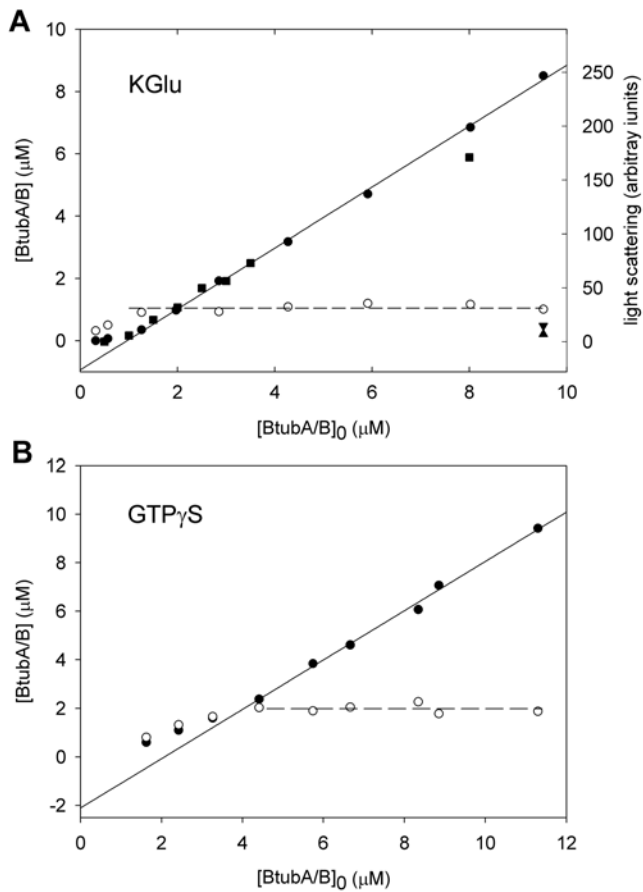

**Figure S2. Continuation of Figure 4.** A, BtubA/B polymerization in Tris-KGlu buffer with 1 mM GTP. B, BtubA/B polymerization in Tris-KCl buffer with 0.1 mM GTP $\gamma$ S. Polymers assembled with GTP $\gamma$ S from 10  $\mu M$  BtubA/B (initially with bound GDP and GTP) contained 0.5-0.6 GTP $\gamma$ S plus 0.3-0.4 GDP and 0.3-0.4 GTP per BtubA/B

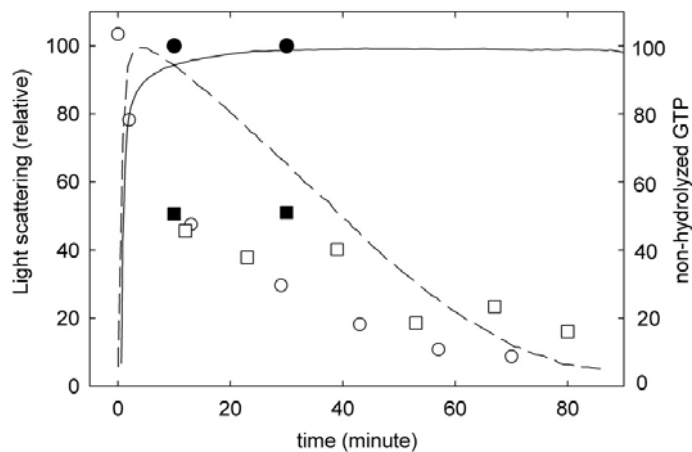

**Figure S3. Continuation of Figure 6.** Solid line, assembly time course of 3  $\mu M$  BtubA/B with 50  $\mu M$  GTP regenerating system in Tris-KGlu buffer with 2 mM MgCl $_2$  at 30  $^{\circ}C$ . Solid circles and squares, percent GTP in supernatant and polymer pellet. Dash line, assembly without regenerating system. Void circles and squares, percent non-hydrolyzed GTP in the supernatant and polymer pellet, respectively

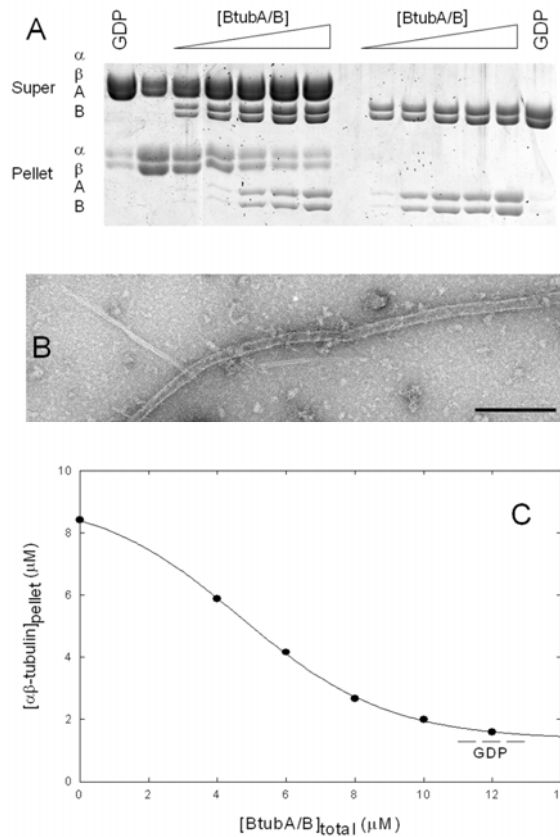

**Fig. S4. Inhibition of microtubule assembly by bacterial tubulin.** The similarities and differences observed between bacterial and eukaryotic tubulin posed the question of whether or not the two proteins could co-polymerize. We explored this possibility with light scattering, sedimentation assays and electron microscopy, under different solution conditions. BtubA/B (10  $\mu\text{M}$ ) did not significantly interfere with the assembly of  $\alpha\beta$ -tubulin in microtubule buffers GAB-1 mM GTP and Pipes-0.1 mM GMPCPP at 30  $^{\circ}\text{C}$ . However, inhibition of the plateau light scattering values of microtubule assembly was observed in Tris-KGlu and Pipes-D<sub>2</sub>O buffers with 1 mM GTP, in which both BtubA/B and  $\alpha\beta$ -tubulin polymerize. GTP was in excess during these experiments.

The effect of BtubA/B on microtubule assembly in Pipes-D<sub>2</sub>O was quantified by pelleting. Panel A, polymerization of  $\alpha\beta$ -tubulin (18  $\mu\text{M}$ ) with increasing concentrations of BtubA/B (0-12  $\mu\text{M}$ ) in Pipes-D<sub>2</sub>O buffer with 1 mM GDP. Note that  $\alpha\beta$ -tubulin separates due to its retarded mobility in SDS-PAGE. Pellets and supernatants were loaded in same lanes with a 30 min electrophoretic shift. Panel B, electron micrograph of BtubA/B polymers and one microtubule assembled in the same solution; the bar indicates 100 nm. Panel C, quantified and plotted results from panel A; the line is drawn solely to show the trend of the data. The results show a clear inhibition by BtubA/B at the concentrations above its  $C_r$  at which it polymerizes, whereas there was no effect below  $C_r$  (panel A). BtubA/B copolymerization into microtubules at the concentrations below its  $C_r$  was not detected by this method. The polymers observed in the mixtures of  $\alpha\beta$ -tubulin and BtubA/B consisted of separate microtubules and characteristic bacterial tubulin filaments (panel B). BtubA/B progressively inhibited  $\alpha\beta$ -tubulin assembly, reaching the background level of non-specific pelleting (panel C). On the other hand,  $\alpha\beta$ -tubulin (18  $\mu\text{M}$ ) did not reproducibly modify BtubA/B assembly in Pipes-D<sub>2</sub>O or Tris-KGlu buffers.

### Loop 1 (H1-S2)

```

BtubA      37G Q T A P G V A P R G N W S S F F S K L G E S S S G S Y V65
BtubB      34G T L K E G S * A A - - A N S N M E V F F H K V R D G K Y V61
Alpha-tub  34G Q M P S D K T I G G D D S F T T F F C E T G A G K H V62
Beta-tub   34G S Y H G D S D L - - Q L E R I N V Y Y N E A T G N K Y V60
  
```

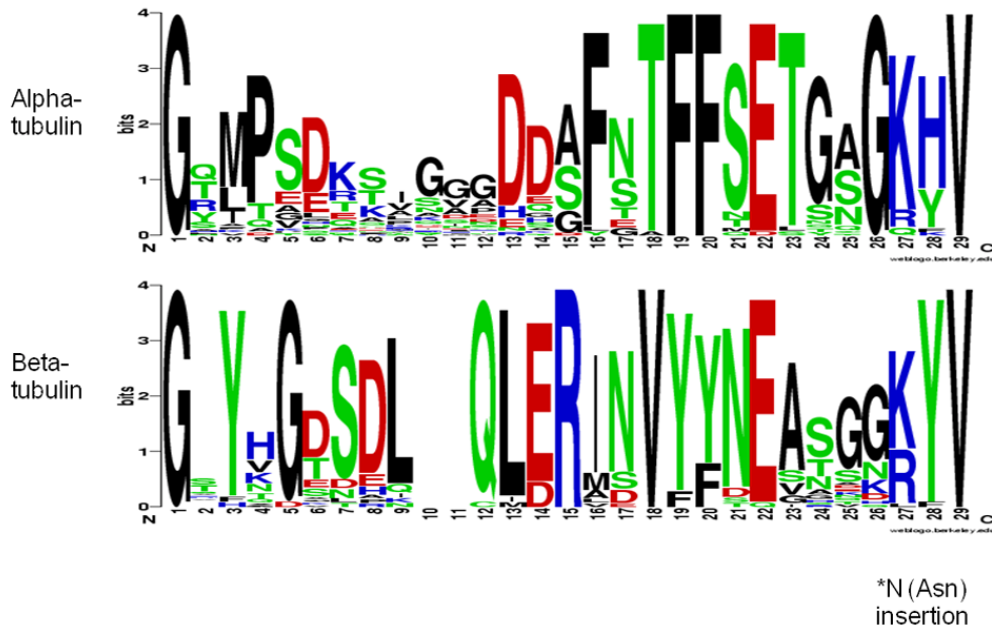

### Loop S (S9-S10)

```

BtubA      358Y V E Q P G - - - - - I S H R K S369
BtubB      353Y A E T A P - - - - - E G F A S S364
Alpha-tub  355I N Y Q P P T V V P G G D L A K V Q R A374
Beta-tub   353v C D I P P - - - - - R G L K M S364
  
```

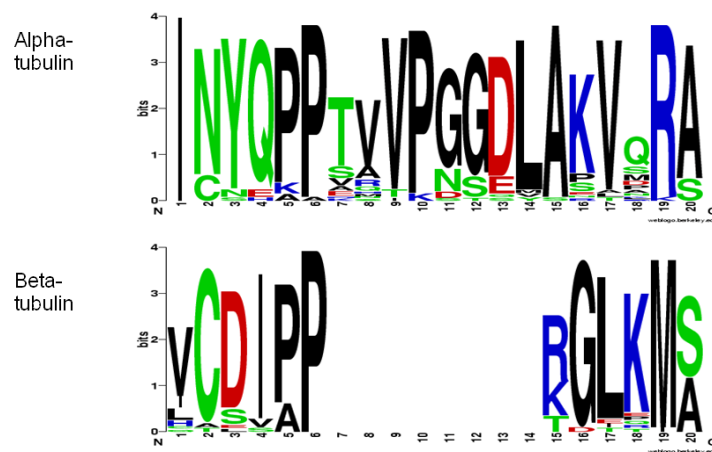

**Figure S5. Btub/tubulin sequence alignments and tubulin occurrence logos for loops H1-S2 and S9-S10.** Equivalent loops for BtubA and BtubB subunits, aligned with bovine alpha- and beta-tubulin. Logos resulting for the alignment of non-redundant eukaryotic tubulin sequences clustered at 90% identity are shown. Logos were produced with the WebLogo server (<http://weblogo.berkeley.edu>).



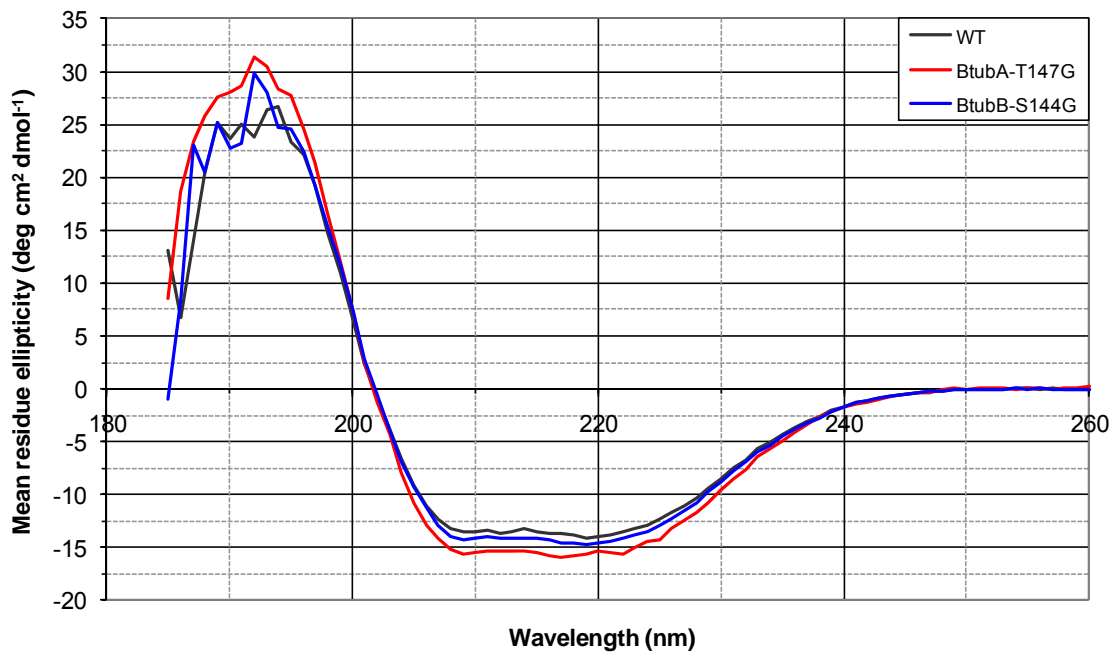

**Figure S6** Circular dichroism spectra of BtubA/B mutants compared to wild type

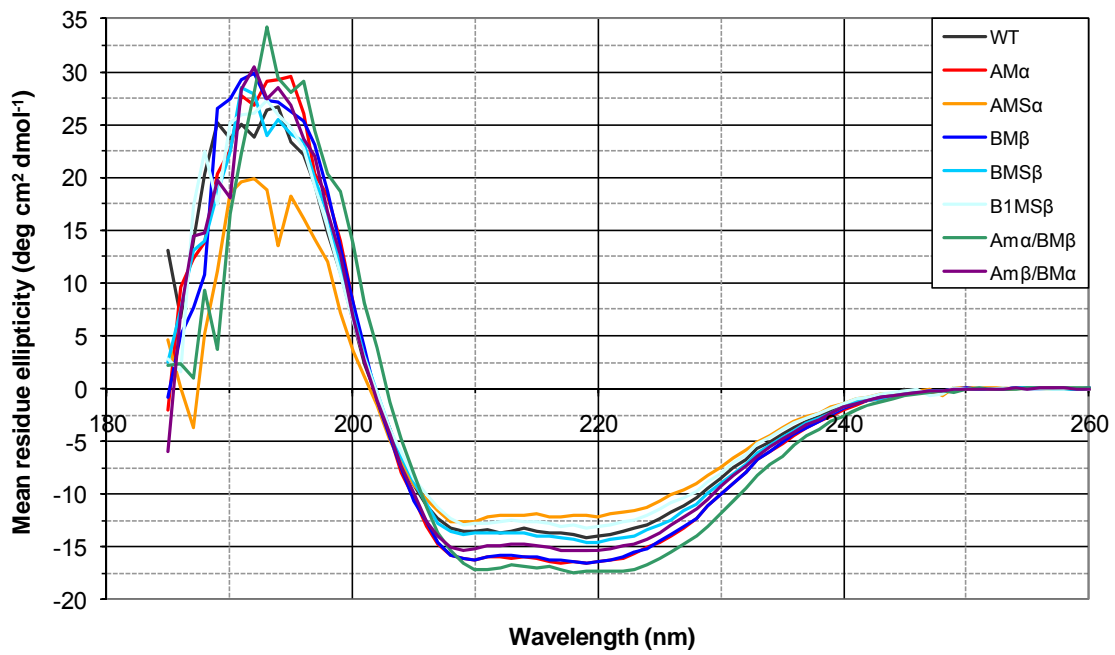

**Figure S7** Circular dichroism spectra of BtubA/B chimera with  $\alpha\beta$ -tubulin loops
